# Supplementary material for: Combinatorial ensemble miRNA target prediction of co-regulation networks with non-prediction data
Source: Oxford University Press journal article supplement (doi:10.1093/nar/gkx605), 2017-07-06
Supplement: gkx605_Supp.zip [file gkx605_Supp.zip]

Archive with 2 entries (2 files):
- nar-01063-n-2017-File003.pdf
- nar-01063-n-2017-File004.xlsx
