# Supplementary material for: Combinatorial ensemble miRNA target prediction of co-regulation networks with non-prediction data
Source: Oxford University Press journal article supplement (doi:10.1093/nar/gkx605), 2017-07-06
Supplement: gkx605_Supp.zip [file gkx605_Supp.zip › nar-01063-n-2017-File004.xlsx]

## Sheet: GeneExp
Series ID	GSM	Sample	Expt	miRNA					PMID
GSE6838	GSM156522	HCT116 Dicer -/- #2, mock, 24 hr vs. HCT116 Dicer -/- #2, miR_16, 100 nM, 24 hr	OE	hsa-miR-16-5p	mimic	array	mock	OE16	17242205
	GSM156524	HCT116 Dicer -/- #2, mock, 24 hr vs. HCT116 Dicer -/- #2, miR_106b, 100 nM, 24 hr	OE	hsa-106b-5p	mimic	array	mock	OE106b	17242205
	GSM156532	HCT116/Dicer -/- #2, mock, 24 hr vs. HCT116/Dicer -/- #2, siRNA_200a, 100 nM, 24 hr	OE	hsa-miR-200a-3p	mimic	array	mock	OE200a	17242205
	GSM156533	HCT116/Dicer -/- #2, mock, 24 hr vs. HCT116/Dicer -/- #2, siRNA_200b, 100 nM, 24 hr	OE	hsa-miR-200b-3p	mimic	array	mock	OE200b	17242205
	GSM156534	HCT116/Dicer -/- #2, mock, 24 hr vs. HCT116/Dicer -/- #2, siRNA_141, 100 nM, 24 hr	OE	hsa-miR-141-3p	mimic	array	mock	OE141	17242205
	GSM156547	HCT116 Dicer -/- #2, mock, 24 hr vs. HCT116 Dicer -/- #2, hsa-miR-192, 100 nM, 24 hr	OE	hsa-miR-192-5p	mimic	array	mock	OE192	17242205
	GSM156548	HCT116 Dicer -/- #2, mock, 24 hr vs. HCT116 Dicer -/- #2, hsa-miR-215, 100 nM, 24 hr	OE	hsa-miR-215-5p	mimic	array	mock	OE215	17242205
	GSM156553	HCT116 Dicer -/- #2, mock, 24 hr vs. HCT116 Dicer -/- #2, hsa-miR-17-5p, 100 nM, 24 hr	OE	hsa-miR-17-5p	mimic	array	mock	OE17_5p	17242205
	GSM156554	HCT116 Dicer -/- #2, mock, 24 hr vs. HCT116 Dicer -/- #2, hsa-miR-20, 100 nM, 24 hr	OE	hsa-miR-20a-5p	mimic	array	mock	OE20	17242205
	GSM156557	HCT116 Dicer -/- #2, mock, 24 hr vs. HCT116 Dicer -/- #2, hsa-let-7c, 100 nM, 24 hr	OE	hsa-let-7c-5p	mimic	array	mock	OElet7c	17242205
	GSM156559	HCT116 Dicer -/- #2, mock vs. HCT116 Dicer -/- #2, miR_195, 100 nM, 24 hr	OE	hsa-miR-195-5p	mimic	array	mock	OE195	17242205
	GSM156578	HCT116 Dicer -/- #2, mock vs. HCT116 Dicer -/- #2, miR_15b, 100 nM, 24 hr	OE	hsa-miR-15b-5p	mimic	array	mock	OE15b	17242205
	GSM156580	HCT116 Dicer -/- #2, mock vs. HCT116 Dicer -/- #2, miR_103, 100 nM, 24 hr	OE	hsa-miR-103a-3p	mimic	array	mock	OE103	17242205
GSE8501	GSM210897	HeLa transfected with miR7 duplex versus control transfected HeLa, 24 hours	OE	hsa-miR-7-5p	mimic	array	mock	OE7	17612493
	GSM210898	HeLa transfected with miR9 duplex versus control transfected HeLa, 24 hours	OE	hsa-miR-9-5p	mimic	array	mock	OE9	17612493
	GSM210901	HeLa transfected with miR122a duplex versus control transfected HeLa, 24 hours	OE	hsa-miR-122-5p	mimic	array	mock	OE122a	17612493
	GSM210903	HeLa transfected with miR128a duplex versus control transfected HeLa, 24 hours	OE	hsa-miR-128-3p	mimic	array	mock	OE128a	17612493
	GSM210904	HeLa transfected with miR132 duplex versus control transfected HeLa, 24 hours	OE	hsa-miR-132-3p	mimic	array	mock	OE132	17612493
	GSM210907	HeLa transfected with miR133a duplex versus control transfected HeLa, 24 hours	OE	hsa-miR-133a-3p	mimic	array	mock	OE133a	17612493
	GSM210909	HeLa transfected with miR142 duplex versus control transfected HeLa, 24 hours	OE	hsa-miR-142-3p	mimic	array	mock	OE142	17612493
	GSM210911	HeLa transfected with miR148b duplex versus control transfected HeLa, 24 hours	OE	hsa-miR-148b-3p	mimic	array	mock	OE148b	17612493
	GSM210913	HeLa transfected with miR181a duplex versus control transfected HeLa, 24 hours	OE	hsa-miR-181a-5p	mimic	array	mock	OE181a	17612493
GSE37918	GSM929909	MCF-7-miR-23b	OE	hsa-miR-23b-3p	mimic	RNAseq			23580553
	GSM929910	MCF-7-miR-nc	ctrl	N/A	mimic	RNAseq			23580553
	GSM929912	MDA-MB-231-sp-23b	KD	hsa-miR-23b-3p	sponge	RNAseq			23580553
	GSM929913	MDA-MB-231-control	ctrl	N/A	sponge	RNAseq			23580553
GSE69630	GSM1704961	control lung cancer cell (A549), replicate 1	ctrl	N/A	lentiviral	array			N/A
	GSM1704962	control lung cancer cell (A549), replicate 2	ctrl	N/A	lentiviral	array			N/A
	GSM1704963	knockdown mir-1246 on lung cancer cell (A549), replicate 1	KD	hsa-miR-1246	lentiviral	array			N/A
	GSM1704964	knockdown mir-1246 on lung cancer cell (A549), replicate 2	KD	hsa-miR-1246	lentiviral	array			N/A
	GSM1704965	knockdown mir-1290 on lung cancer cell (A549), replicate 1	KD	hsa-miR-1290	lentiviral	array			N/A
	GSM1704966	knockdown mir-1290 on lung cancer cell (A549), replicate 2	KD	hsa-miR-1290	lentiviral	array			N/A
	GSM1704967	control normal lung epithelial cell (Nuli-1), replicate 1	ctrl	N/A	lentiviral	array			N/A
	GSM1704968	control normal lung epithelial cell (Nuli-1), replicate 2	ctrl	N/A	lentiviral	array			N/A
	GSM1704969	overexpress mir-1246 on normal lung epithelial cell (Nuli-1), replicate 1	OE	hsa-miR-1246	lentiviral	array			N/A
	GSM1704970	overexpress mir-1246 on normal lung epithelial cell (Nuli-1), replicate 2	OE	hsa-miR-1246	lentiviral	array			N/A
	GSM1704971	overexpress mir-1290 on normal lung epithelial cell (Nuli-1), replicate 1	OE	hsa-miR-1290	lentiviral	array			N/A
	GSM1704972	overexpress mir-1290 on normal lung epithelial cell (Nuli-1), replicate 2	OE	hsa-miR-1290	lentiviral	array			N/A
GSE67631	GSM1652424	MCF7-luc anti-NC-1	ctrl	N/A	lentiviral	array			26065921
	GSM1652425	MCF7-luc anti-NC-2	ctrl	N/A	lentiviral	array			26065921
	GSM1652426	MCF7-luc anti-NC-3	ctrl	N/A	lentiviral	array			26065921
	GSM1652427	MCF7-luc anti-miR-27b-1	KD	hsa-miR-27b-5p	lentiviral	array			26065921
	GSM1652428	MCF7-luc anti-miR-27b-2	KD	hsa-miR-27b-5p	lentiviral	array			26065921
	GSM1652429	MCF7-luc anti-miR-27b-3	KD	hsa-miR-27b-5p	lentiviral	array			26065921
	GSM1652430	MCF7-luc miR-27b o.e-1	OE	hsa-miR-27b-5p	lentiviral	array			26065921
	GSM1652431	MCF7-luc miR-27b o.e-2	OE	hsa-miR-27b-5p	lentiviral	array			26065921
	GSM1652432	MCF7-luc miR-27b o.e-3	OE	hsa-miR-27b-5p	lentiviral	array			26065921
GSE40189	GSM988096	PANC-1 premir control 1	ctrl	N/A	mimic*	array			N/A
	GSM988097	PANC-1 premir control 2	ctrl	N/A	mimic*	array			N/A
	GSM988098	PANC-1 premir control 3	ctrl	N/A	mimic*	array			N/A
	GSM988099	PANC-1 premir miR-10b 1	OE	hsa-miR-10b-5p	mimic*	array			N/A
	GSM988100	PANC-1 premir miR-10b 2	OE	hsa-miR-10b-5p	mimic*	array			N/A
	GSM988101	PANC-1 premir miR-10b 3	OE	hsa-miR-10b-5p	mimic*	array			N/A
	GSM988102	PANC-1 antimir control 1	ctrl	N/A	mimic*	array			N/A
	GSM988103	PANC-1 antimir control 2	ctrl	N/A	mimic*	array			N/A
	GSM988104	PANC-1 antimir control 3	ctrl	N/A	mimic*	array			N/A
	GSM988105	PANC-1 antimir-10b 1	KD	hsa-miR-10b-5p	mimic*	array			N/A
	GSM988106	PANC-1 antimir-10b 2	KD	hsa-miR-10b-5p	mimic*	array			N/A
	GSM988107	PANC-1 antimir-10b 3	KD	hsa-miR-10b-5p	mimic*	array			N/A
GSE40458	GSM994478	KD control 13A	ctrl	N/A	lentiviral	array			23142521
	GSM994479	126KD 14A n	KD	hsa-miR126-5p/3p	lentiviral	array			23142521
	GSM994480	OE control 15A	ctrl	N/A	lentiviral	array			23142521
	GSM994481	126OE 16A	OE	hsa-miR126-5p/3p	lentiviral	array			23142521
	GSM994482	KD control 17A n	ctrl	N/A	lentiviral	array			23142521
	GSM994483	126KD 18A n	KD	hsa-miR126-5p/3p	lentiviral	array			23142521
	GSM994484	OE control 19A n	ctrl	N/A	lentiviral	array			23142521
	GSM994485	126OE 20A n	OE	hsa-miR126-5p/3p	lentiviral	array			23142521
	GSM994486	KD control 21A n	ctrl	N/A	lentiviral	array			23142521
	GSM994487	126KD 22A n	KD	hsa-miR126-5p/3p	lentiviral	array			23142521
	GSM994488	OE control 23A n	ctrl	N/A	lentiviral	array			23142521
	GSM994489	126OE 24A n	OE	hsa-miR126-5p/3p	lentiviral	array			23142521
GSE16962	GSM424759	pSUPER-scramble replicate 1	ctrl	N/A	mimic	array			19826008
	GSM424760	pSUPER-scramble replicate 2	ctrl	N/A	mimic	array			19826008
	GSM424761	pSUPER-scramble replicate 3	ctrl	N/A	mimic	array			19826008
	GSM424762	pSUPER-mir-210 replicate 1	OE	hsa-miR-210-3p	mimic	array			19826008
	GSM424763	pSUPER-mir-210 replicate 2	OE	hsa-miR-210-3p	mimic	array			19826008
	GSM424764	pSUPER-mir-210 replicate 3	OE	hsa-miR-210-3p	mimic	array			19826008
	GSM424765	Anti-scramble replicate 1	ctrl	N/A	LNA	array			19826008
	GSM424766	Anti-scramble replicate 2	ctrl	N/A	LNA	array			19826008
	GSM424767	Anti-scramble replicate 3	ctrl	N/A	LNA	array			19826008
	GSM424768	Anti-mir-210 replicate 1	KD	hsa-miR-210-3p	LNA	array			19826008
	GSM424769	Anti-mir-210 replicate 2	KD	hsa-miR-210-3p	LNA	array			19826008
	GSM424770	Anti-mir-210 replicate 3	KD	hsa-miR-210-3p	LNA	array			19826008
Note1	Notes: miR-10b, miR1246, and miR1290 studies are not yet published. Details obtained from GEO entries. Mimic* is inferred mimic modulation.
Note2	In cases of lentiviral modulation via shRNA, the mature form listed in the table is that associated with greatest level of detection in miRBase
	The listed miRNA has at least 2 fold greater detection (by read count across experiments). In the case of miR-126 however, reads were comparable
	and thus could not be assigned to a specific mature ID
Note3	GSM988100 by quality control exhibited inconsistencies with other data (did not conform to the intensity boxplot distribution obtained across other
	samples which did exhibit consistency. This sample was thus excluded from the analysis

## Sheet: Proteomics
Name	Year	miRNA	citation	PMID
Baek	2008	hsa-miR-1	Nature. 2008, 455(7209):64-71	18668037
		hsa-miR-124-3p
Selbach	2008	hsa-let-7b-5p	Nature. 2008, 455(7209):58-63	18668040
		hsa-miR-1
		hsa-miR-155
		hsa-miR-16-5p
		hsa-miR-30a-5p
Fasanaro	2009	hsa-miR-210-3p	J Biol Chem. 2009, 284(50):35134-43	19826008
Iwaki	2013	hsa-miR-376c-3p	PLoS One. 2013, 8(7):e69496	23922722
Comegna	2014	hsa-miR-494-3p	FASEB J. 2014, 28(8):3720-33	24823364
De Antonellis	2014	hsa-miR-34a-5p	Mol Cell Proteomics. 2014, 13(8):2114-31	24912852
Jasinski-Bergner	2014	hsa-miR-152-3p	J Biol Chem. 2014, 289(45):31121-35	25228695
Ji	2014	hsa-miR-27a-5p	PLoS One. 2014, 9(9):e108351	25265485
Moreno-Moya	2014	hsa-miR-30d-5p	Mol Hum Reprod. 2014, 20(6):550-66	24489115
Thomsen	2015	hsa-miR-155-5p	Oncotarget. 2015, 6(30):29224-39	26317550
